# Supplementary material for: Unimodal statistical learning produces multimodal object-like representations
Source: eLife journal article supplement (doi:10.7554/elife.43942), 2019-05-01
Supplement: supp [file elife-43942-supp-v1.zip]

Archive with 3 entries (3 files):
- elife_poa_e43942_Figure_1_figure_supplement_1.pdf
- elife_poa_e43942_Transparent_Reporting_File.pdf
- elife_poa_e43942_Figure_1_figure_supplement_2.pdf
