# Supplementary material for: Unimodal statistical learning produces multimodal object-like representations
Source: eLife journal article supplement (doi:10.7554/elife.43942), 2019-05-01
Supplement: supp [file elife-43942-supp-v1.zip › elife_poa_e43942_Figure_1_figure_supplement_2.pdf]

# Haptic-to-visual experiment

## PHASE 1. HAPTIC TASK TRAINING

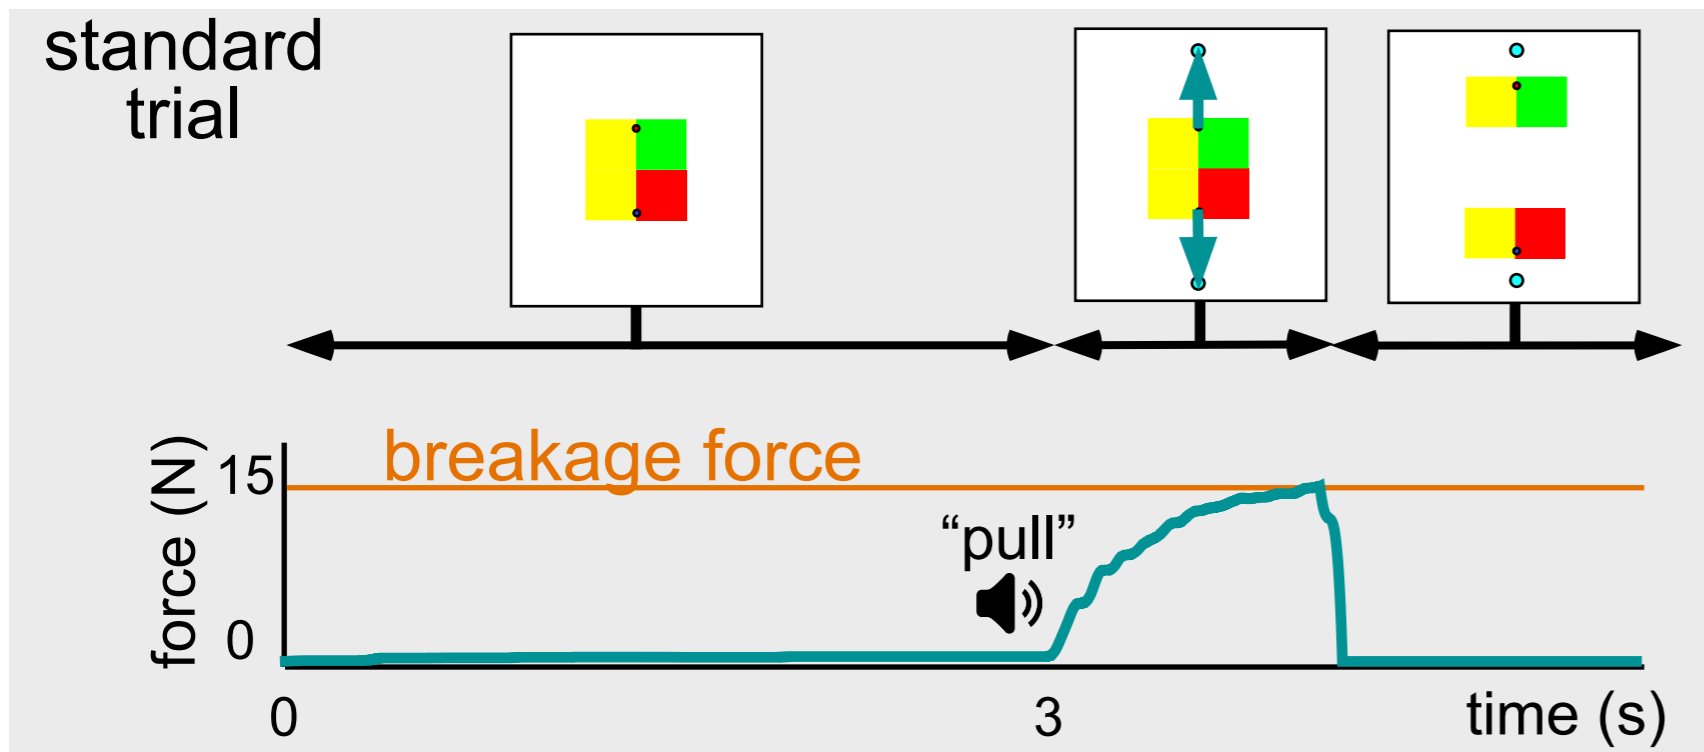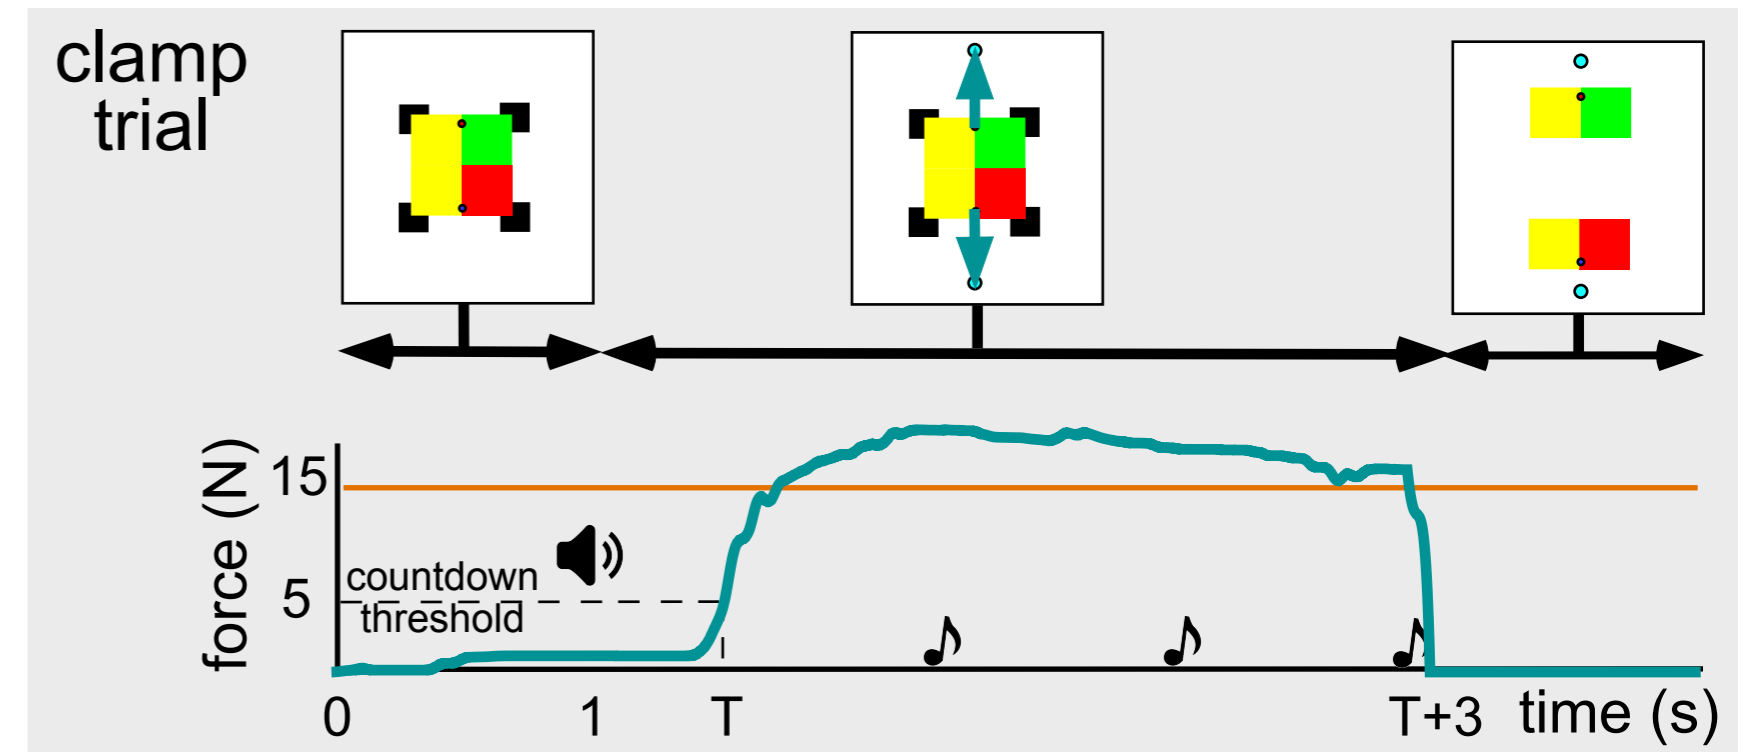

## PHASE 2. HAPTIC STATISTICAL EXPOSURE

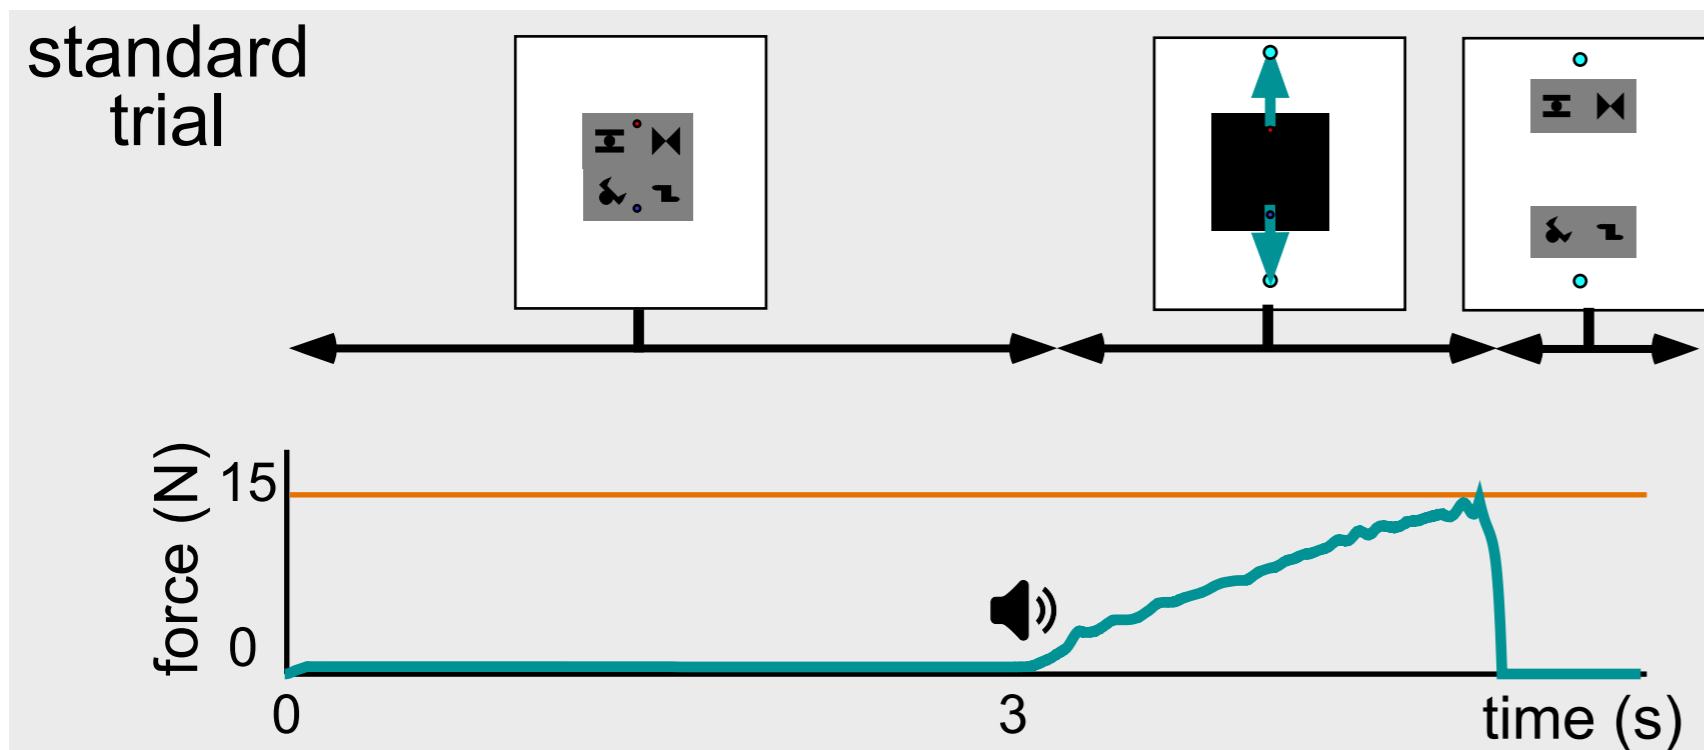

## PHASE 3. HAPTIC PULLING TEST

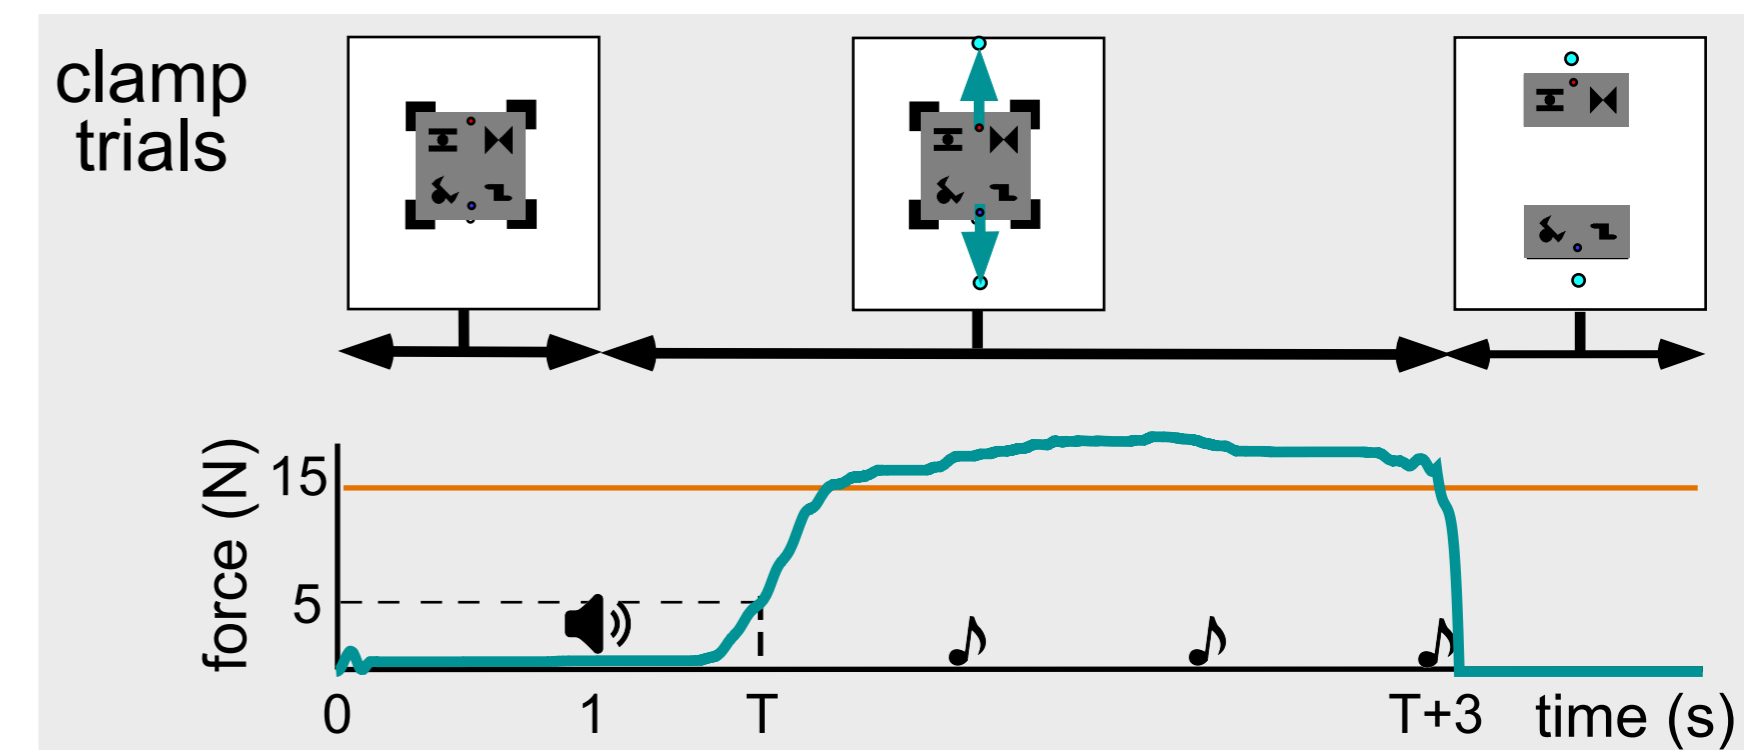

## PHASE 4. VISUAL FAMILIARITY TEST
